# Supplementary material for: Defects in the C. elegans acyl-CoA Synthase, acs-3, and Nuclear Hormone Receptor, nhr-25, Cause Sensitivity to Distinct, but Overlapping Stresses
Source: PLoS One. 2014 Mar 20;9(3):e92552. doi: 10.1371/journal.pone.0092552 (PMC3961378; doi:10.1371/journal.pone.0092552)
Supplement: Table S2 — Genes down-regulated in acs-3(ft5) mutants. List of differentially expressed, down-regulated genes in acs-3(ft5) mutants compared to WT animals. The data represent the analysis from three independent mRNA isolations and microarray hybridizations. “ID” refers to the identity of individual spots on the arrays, “logFC” represents the log of the fold change, gene public name is from the WS220 release. Genes in the indicated GOrilla gene ontology classes are color coded, as described in the table. (XLSX) [file pone.0092552.s004.xlsx]

## Sheet: Sheet1
ID	Gene sequence name	logFC	p value	Gene WB ID	Gene Public Name*			* from WS220 release
cea2.p.124717	T13F3.6	-4.583	<1.00E-06	WBGene00011753	T13F3.6
cea2.d.02954	F31F4.7	-4.247	6e-05	WBGene00017959	ugt-42
cea2.p.95102	K02D7.3	-4.005	3e-05	WBGene00000675	col-101			GOrilla Gene ontology class
cea2.i.13320	F58E1.3	-3.837	0.00074	WBGene00019035	fbxb-26				Cuticle/structural component
cea2.p.113212	F15E11.12	-3.805	0.00023	WBGene00017498	F15E11.12
cea2.i.45823	W06G6.11	-3.617	5e-05	WBGene00012313	W06G6.11
cea2.p.50848	Y48E1B.8	-3.573	0.00081	WBGene00013007	Y48E1B.8
cea2.p.158386	F15E11.14	-3.537	5e-05	WBGene00017500	F15E11.14
cea2.p.132864	C05E11.4	-3.479	1e-05	WBGene00000133	amt-1
cea2.i.18516	C02D5.3	-3.471	1e-05	WBGene00015337	gsto-2
cea2.i.51653	C43H6.9	-3.468	0.0003	WBGene00001618	glr-7
cea2.3.24008	T15D6.3	-3.337	1e-05	WBGene00001642	gly-17
cea2.i.41252	K06H6.3	-3.302	6e-05	WBGene00019451	nstp-7
cea2.p.158404	T20D4.5	-3.295	0.00037	WBGene00020611	T20D4.5
cea2.d.06114	T28C12.5	-3.251	4e-05	WBGene00020892	T28C12.5
cea2.d.45030	Y53H1B.6	-3.198	0.0008	WBGene00013184	Y53H1B.6
cea2.i.58959	T05B4.6	-3.046	0.0005	WBGene00005880	srw-133
cea2.i.27988	R13A1.7	-3.014	9e-05	WBGene00020044	R13A1.7
cea2.d.03862	F53F8.2	-2.955	0.00085	WBGene00009999	srsx-35
cea2.i.42675	R09B5.4	-2.935	0.00014	WBGene00019977	fpn-1.2
cea2.p.87235	C32H11.12	-2.885	5e-05	WBGene00007875	dod-24
cea2.p.11540	F53G12.7	-2.872	<1.00E-06	WBGene00000622	col-45
cea2.d.30327	F59D8.1	-2.847	0.00017	WBGene00006927	vit-3
cea2.i.36799	F16B4.10	-2.758	1e-05	WBGene00017511	srbc-41
cea2.p.154713	T22B7.7	-2.736	4e-05	WBGene00020674	T22B7.7
cea2.i.50632	C16D6.2	-2.709	0.00061	WBGene00007635	npr-4
cea2.p.158409	Y45G12C.7	-2.672	0.00077	WBGene00021570	srd-73
cea2.d.26120	F45D11.14	-2.662	9e-05	WBGene00018459	F45D11.14
cea2.p.75254	W02B3.7	-2.599	0.00061	WBGene00020927	W02B3.7
cea2.i.53381	F31B9.2	-2.598	0.00075	WBGene00009279	F31B9.2
cea2.i.35919	F07C4.5	-2.595	1e-05	WBGene00005108	srd-30
cea2.d.20845	F15E11.1	-2.589	0.00021	WBGene00017490	F15E11.1
cea2.i.58859	F28C12.6	-2.575	4e-05	WBGene00009210	F28C12.6
cea2.i.45509	T28A11.6	-2.56	0.00082	WBGene00020873	T28A11.6
cea2.i.41896	K12D9.9	-2.527	0.00037	WBGene00005859	srw-112
cea2.i.45909	W07A8.4	-2.515	0.00022	WBGene00012320	srxa-3
cea2.i.32244	C02A12.3	-2.478	0.00087	WBGene00015316	srbc-30
cea2.p.78886	Y54F10AR.2	-2.478	<1.00E-06	WBGene00021855	Y54F10AR.2
cea2.i.45161	T24A6.11	-2.419	0.00045	WBGene00020750	nhr-222
cea2.i.59950	M04F3.2	-2.416	0.00022	WBGene00019768	M04F3.2
cea2.i.16393	W10G11.3	-2.397	0.00062	WBGene00021136	W10G11.3
cea2.d.06866	Y50D4B.4	-2.367	<1.00E-06	WBGene00021743	Y50D4B.4
cea2.i.32801	C07G3.5	-2.352	5e-05	WBGene00006259	str-228
cea2.d.33406	K10G4.6	-2.343	0.00019	WBGene00005336	srh-117
cea2.p.148451	H11E01.2	-2.326	2e-05	WBGene00019187	H11E01.2
cea2.i.58826	C55A6.8	-2.264	0.00026	WBGene00008337	C55A6.8
cea2.p.127862	Y38H6C.14	-2.244	0.00034	WBGene00012626	Y38H6C.14
cea2.p.153685	T10B10.3	-2.237	<1.00E-06	WBGene00011680	T10B10.3
cea2.p.158050	C04E12.4	-2.197	6e-05	WBGene00015434	C04E12.4
cea2.i.30238	Y45F10B.14	-2.17	0.00056	WBGene00005088	srd-10
cea2.p.121879	R02C2.3	-2.163	0.00012	WBGene00006419	oac-39
cea2.i.56039	M153.3	-2.144	0.00073	WBGene00010926	M153.3
cea2.3.05195	C35A5.3	-2.141	3e-05	WBGene00007947	C35A5.3
cea2.d.22879	F31F6.3	-2.129	0.00019	WBGene00009302	F31F6.3
cea2.i.43302	T01G6.3	-2.045	0.00027	WBGene00006233	str-196
cea2.p.65331	F53A2.2	-2.044	0.00065	WBGene00009950	sdz-20
cea2.d.31787	K02A2.1	-2.034	1e-05	WBGene00019288	K02A2.1
cea2.i.31598	ZK1251.7	-2.032	0.00025	WBGene00014242	sdz-36
cea2.i.59929	F31F6.1	-1.999	0.00037	WBGene00009300	F31F6.1
cea2.d.04672	K12H6.9	-1.989	0.00066	WBGene00019689	K12H6.9
cea2.i.39348	F47C10.6	-1.983	4e-05	WBGene00018543	ugt-32
cea2.c.49390	C52D10.6	-1.974	6e-05	WBGene00004818	skr-12
cea2.i.59956	T10C6.9	-1.956	0.00087	WBGene00011690	T10C6.9
cea2.c.17748	C30D11.1	-1.945	2e-05	WBGene00006830	unc-103
cea2.p.74760	T24C4.7	-1.942	2e-05	WBGene00020763	ztf-18
cea2.p.89211	C53B4.5	-1.938	7e-05	WBGene00000693	col-119
cea2.d.07549	ZK512.7	-1.86	1e-05	WBGene00013986	ZK512.7
cea2.i.56646	T01B10.1	-1.852	3e-05	WBGene00001693	grd-4
cea2.p.96207	M7.9	-1.849	0.00014	WBGene00010885	M7.9
cea2.i.50923	C24A3.1	-1.847	0.00012	WBGene00016032	C24A3.1
cea2.i.27375	K08D12.6	-1.846	8e-05	WBGene00019540	K08D12.6
cea2.i.21304	W09D6.3	-1.835	0.00025	WBGene00006273	str-246
cea2.i.05712	Y26D4A.8	-1.824	0.00012	WBGene00012505	Y26D4A.8
cea2.p.76267	Y39A1A.16	-1.82	1e-05	WBGene00012654	Y39A1A.16
cea2.c.41919	C34F6.2	-1.813	<1.00E-06	WBGene00000751	col-178
cea2.i.15894	T24E12.6	-1.799	0.00075	WBGene00020775	T24E12.6
cea2.i.30231	Y45F10B.12	-1.79	0.00099	WBGene00012874	Y45F10B.12
cea2.i.12525	F45C12.1	-1.777	0.00031	WBGene00018432	irld-33
cea2.i.23982	C32H11.3	-1.738	0.00013	WBGene00007866	C32H11.3
cea2.i.31044	Y69A2AR.25	-1.729	1e-05	WBGene00022096	Y69A2AR.25
cea2.i.42067	M162.1	-1.707	0.00022	WBGene00010927	clec-259
cea2.i.53228	F23D12.1	-1.706	1e-05	WBGene00009085	F23D12.1
cea2.p.159335	F22A3.6	-1.702	0.00012	WBGene00017691	ilys-5
cea2.d.11950	C09G12.5	-1.687	0.00045	WBGene00015655	C09G12.5
cea2.i.43403	T03D3.1	-1.678	7e-05	WBGene00020182	ugt-53
cea2.i.39543	F49A5.7	-1.654	6e-05	WBGene00009859	clec-33
cea2.i.10379	D1022.3	-1.64	6e-05	WBGene00017022	D1022.3
cea2.i.58917	K08D9.4	-1.64	0.00089	WBGene00019525	K08D9.4
cea2.i.58790	C24A11.6	-1.616	0.00019	WBGene00016043	C24A11.6
cea2.p.36165	F11G11.11	-1.613	9e-05	WBGene00000609	col-20
cea2.p.136035	C34F6.3	-1.601	0.00011	WBGene00000752	col-179
cea2.i.35953	F07G11.7	-1.585	0.00035	WBGene00017232	F07G11.7
cea2.i.42481	R08F11.2	-1.568	0.00053	WBGene00019966	srt-30
cea2.c.49373	ZK1193.1	-1.568	0.00071	WBGene00000608	col-19
cea2.i.55662	K09A11.2	-1.554	0.00058	WBGene00010705	cyp-14A1
cea2.i.46358	Y19D10B.4	-1.523	0.00098	WBGene00021233	Y19D10B.4
cea2.p.115085	F26F12.1	-1.5	9e-05	WBGene00000713	col-140
cea2.i.41089	K04F1.16	-1.493	0.00099	WBGene00005231	srh-5
cea2.c.05035	K10D3.6	-1.482	0.00087	WBGene00010740	K10D3.6
cea2.i.16454	Y110A2AM.1	-1.469	0.00087	WBGene00022449	Y110A2AM.1
cea2.p.27619	ZK993.1	-1.467	0.0002	WBGene00022837	ceh-45
cea2.c.47712	T10B10.2	-1.462	2e-05	WBGene00011679	ucr-2.2
cea2.i.42786	R11D1.3	-1.446	<1.00E-06	WBGene00011244	R11D1.3
cea2.i.10818	F09E5.13	-1.433	1e-05	WBGene00000094	agt-2
cea2.p.124403	T09F5.9	-1.404	0.00091	WBGene00011668	clec-47
cea2.c.42459	C49F5.1	-1.392	0.00011	WBGene00008205	sams-1
cea2.p.124499	T10C6.7	-1.388	0.00042	WBGene00011689	T10C6.7
cea2.c.40280	Y113G7B.23	-1.386	0.00021	WBGene00004203	swsn-1
cea2.p.136646	C39E6.4	-1.364	0.00088	WBGene00003377	mls-2
cea2.p.158092	F43G6.7	-1.347	0.00013	WBGene00009659	F43G6.7
cea2.p.60369	C56G2.15	-1.341	0.00069	WBGene00016983	C56G2.15
cea2.i.47322	Y47D7A.12	-1.341	0.00033	WBGene00021624	Y47D7A.12
cea2.c.49420	Y111B2A.2	-1.335	1e-05	WBGene00013728	Y111B2A.2
cea2.p.154731	T22E5.2	-1.325	0.00093	WBGene00001622	glt-4
cea2.p.134935	C25F6.1	-1.32	0.00015	WBGene00016102	C25F6.1
cea2.p.43957	R03D7.2	-1.308	0.00027	WBGene00010989	R03D7.2
cea2.d.22179	F26F2.2	-1.302	0.00043	WBGene00009167	F26F2.2
cea2.i.43927	T06E6.7	-1.269	0.00048	WBGene00005464	srh-258
cea2.c.50256	Y51H4A.10	-1.267	0.0003	WBGene00013105	fip-7
cea2.i.08550	C03H5.1	-1.258	0.00027	WBGene00015403	clec-10
cea2.p.106915	B0213.14	-1.227	0.00013	WBGene00015043	cyp-34A8
cea2.d.17624	C52D10.8	-1.221	0.00033	WBGene00004819	skr-13
cea2.c.18330	F01F1.6	-1.215	0.00014	WBGene00000115	alh-9
cea2.p.17000	T10B11.1	-1.209	0.00091	WBGene00020397	pcbd-1
cea2.d.30228	F58G1.8	-1.197	0.00098	WBGene00010270	F58G1.8
cea2.d.05343	T05H4.4	-1.192	0.0002	WBGene00020267	T05H4.4
cea2.i.48639	ZC412.1	-1.179	0.00052	WBGene00013883	npr-13
cea2.p.97677	T05A1.2	-1.178	0.00063	WBGene00000696	col-122
cea2.d.46349	Y69A2AR.12	-1.167	0.00043	WBGene00022083	Y69A2AR.12
cea2.i.61248	F01D5.2	-1.163	7e-05	WBGene00008493	F01D5.2
cea2.i.16474	Y17G7B.1	-1.162	0.00059	WBGene00012457	acbp-6
cea2.p.87222	C32H11.4	-1.155	0.00077	WBGene00007867	C32H11.4
cea2.i.58729	ZK899.1	-1.149	0.00071	WBGene00014140	ZK899.1
cea2.i.39618	F52F10.4	-1.145	0.00026	WBGene00018708	oac-32
cea2.i.33047	C12D5.9	-1.139	7e-05	WBGene00015710	C12D5.9
cea2.i.59955	T08D2.1	-1.122	0.00089	WBGene00011606	T08D2.1
cea2.i.48550	ZC266.1	-1.117	0.00074	WBGene00022584	ZC266.1
cea2.i.31210	Y73F8A.18	-1.115	0.00061	WBGene00013525	irld-59
cea2.p.69392	M88.4	-1.105	0.00085	WBGene00010907	M88.4
cea2.c.43172	F09E10.6	-1.096	0.00091	WBGene00017296	F09E10.6
cea2.c.50260	C49G7.4	-1.095	1e-05	WBGene00016782	phat-3
cea2.i.42740	R10D12.11	-1.093	0.00084	WBGene00011192	srh-24
cea2.d.38088	T08D2.7	-1.06	0.00069	WBGene00011612	T08D2.7
cea2.p.79920	Y71H2B.1	-1.053	0.00046	WBGene00022191	Y71H2B.1
cea2.p.74225	T20G5.5	-1.041	0.00037	WBGene00004255	epac-1
cea2.i.59619	T28A11.2	-1.026	0.00019	WBGene00020869	T28A11.2
cea2.p.106225	ZK792.2	-1.021	0.00015	WBGene00002130	inx-8
cea2.d.02567	F20D6.5	-1.018	5e-05	WBGene00017635	F20D6.5
cea2.3.25530	VT23B5.1	-1.012	0.00088	WBGene00197955	VT23B5.1
cea2.i.38865	F40G12.2	-1.009	0.00076	WBGene00009597	F40G12.2
cea2.i.27429	K10D11.1	-1.002	0.00059	WBGene00010745	dod-17
